# Supplementary material for: Restrained Th17 response and myeloid cell infiltration into the central nervous system by human decidua-derived mesenchymal stem cells during experimental autoimmune encephalomyelitis
Source: PubMed Central journal article supplement (PMC4797118; doi:10.1186/s13287-016-0304-5), 2016-03-17

**A**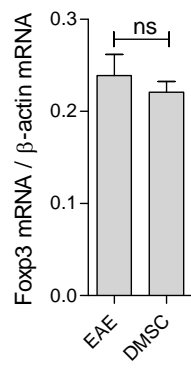**B**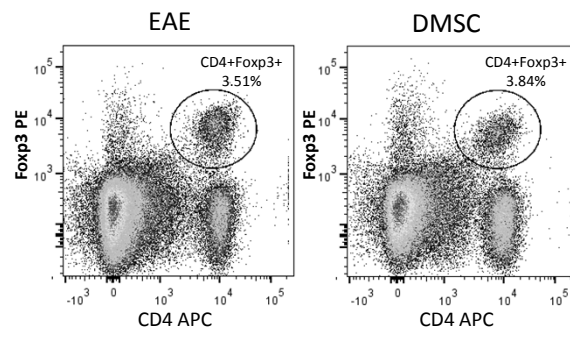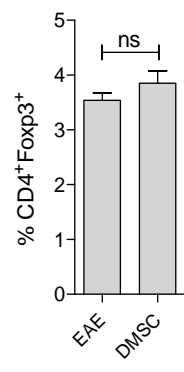

Supplement: 13287_2016_304_MOESM1_ESM.pdf [file 13287_2016_304_MOESM1_ESM.pdf]
