# Supplementary material for: Restrained Th17 response and myeloid cell infiltration into the central nervous system by human decidua-derived mesenchymal stem cells during experimental autoimmune encephalomyelitis
Source: PubMed Central journal article supplement (PMC4797118; doi:10.1186/s13287-016-0304-5), 2016-03-17
Supplement: 13287_2016_304_MOESM2_ESM.pdf [file 13287_2016_304_MOESM2_ESM.pdf]

**A**

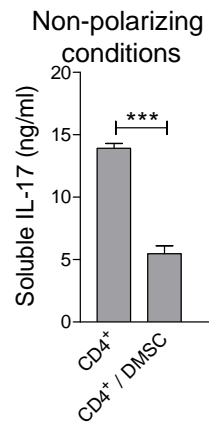

**B**

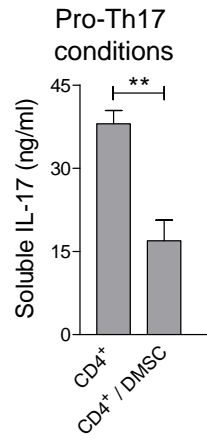

First  $\alpha$ CD3/ $\alpha$ CD28 round
